# Supplementary material for: Wafer-sized 2D perovskite single crystal thin films for UV photodetectors
Source: Royal Society of Chemistry journal article supplement (doi:10.1039/d1tc00408e), 2021-01-01
Supplement: d1tc00408e1.pdf [file d1tc00408e1.pdf]

## ESI

# Wafer-sized 2D Perovskite Single Crystal Thin Film for UV Photodetector

*Sheng Wang,<sup>ab</sup> Yuan Chen,<sup>\*b</sup> Junjie Yao,<sup>b</sup> Guoxiang Zhao,<sup>b</sup> Longzhi Li,<sup>\*a</sup> Guifu  
Zou<sup>\*ab</sup>*

<sup>a</sup> College of Mechanical and Electronic Engineering, Shandong University of  
Science and Technology, Qingdao, 266590, P.R. China.

<sup>b</sup> College of Energy, Soochow Institute for Energy and Materials Innovations,  
and Key Laboratory of Advanced Carbon Material and Wearable Energy  
Technologies of Jiangsu Province, Soochow University, Suzhou, 215006, P.R.  
China.

\*Correspondence and requests for materials should be addressed to:

Y. Chen: email: [ychen216@stu.suda.edu.cn](mailto:ychen216@stu.suda.edu.cn)

L.Z. Li: email: [lilongzhi630@163.com](mailto:lilongzhi630@163.com)

G.F. Zou: email: [zouguifu@suda.edu.cn](mailto:zouguifu@suda.edu.cn)

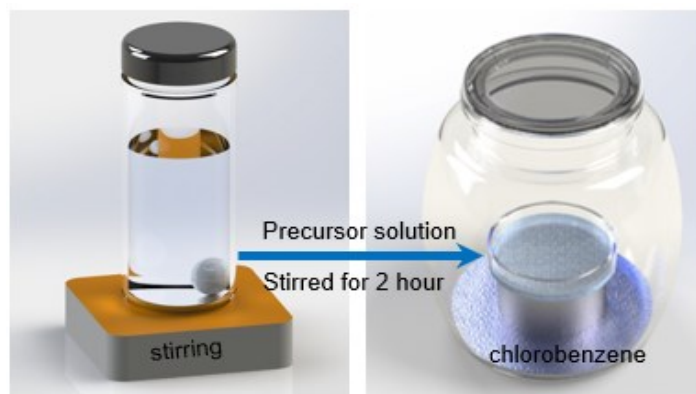

**Fig. S1** Schematic illustration of the growth of  $\text{BA}_2\text{PbBr}_4$  single crystal thin films by a gas-liquid interface crystalline route.

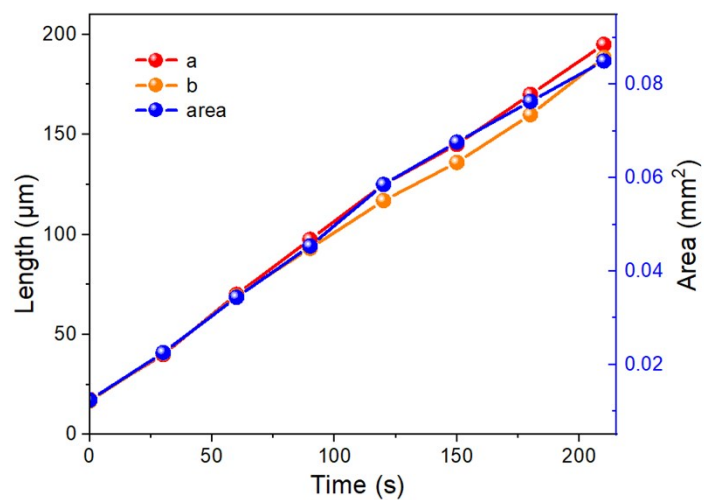

**Fig. S2** The length and area of the  $\text{BA}_2\text{PbBr}_4$  SCTF change with time.

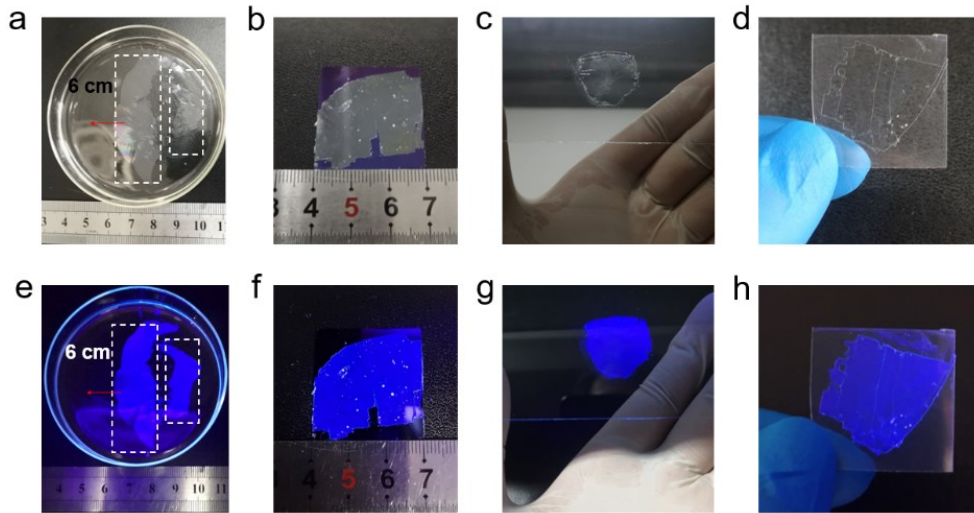

**Fig. S3** Photographs of the  $\text{BA}_2\text{PbBr}_4$  SCTF. (a)  $\text{BA}_2\text{PbBr}_4$  SCTF in solution (b) transferred on  $\text{SiO}_2$  (c) glass (d) PET. (e-f) Photographs corresponding to the above one by one under strong UV lamp, the excitation wavelength is 375 nm.

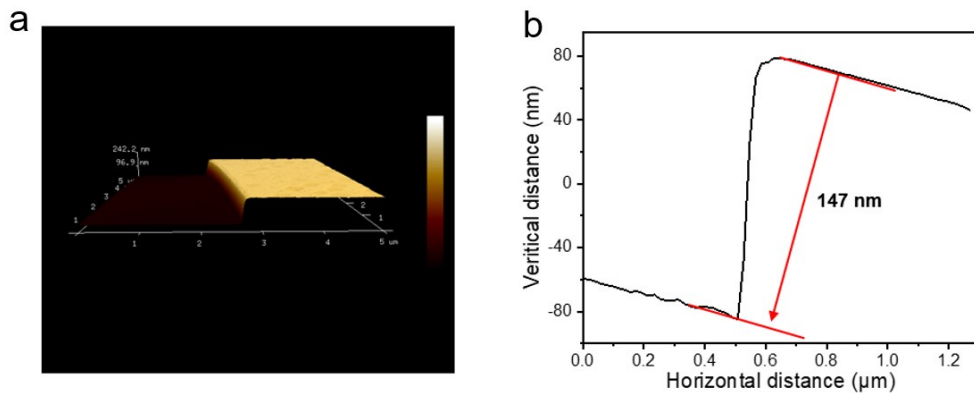

**Fig. S4** (a) 3D AFM topographic of a  $\text{BA}_2\text{PbBr}_4$  SCTF. (b) Height profile of the line scan.

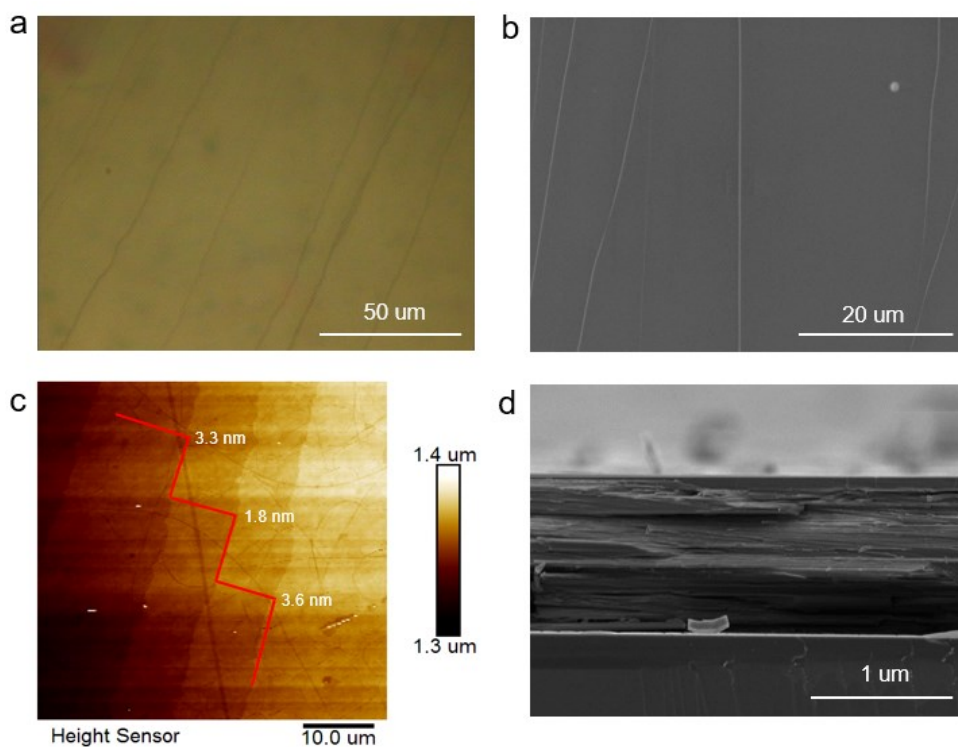

**Fig. S5** (a) Optical image of the  $\text{BA}_2\text{PbBr}_4$  crystalline surface. (b) SEM image of the  $\text{BA}_2\text{PbBr}_4$  crystalline top view. (c) AFM image of a  $\text{BA}_2\text{PbBr}_4$  crystalline surface. (d) Cross-sectional SEM image of layered  $\text{BA}_2\text{PbBr}_4$  crystal.

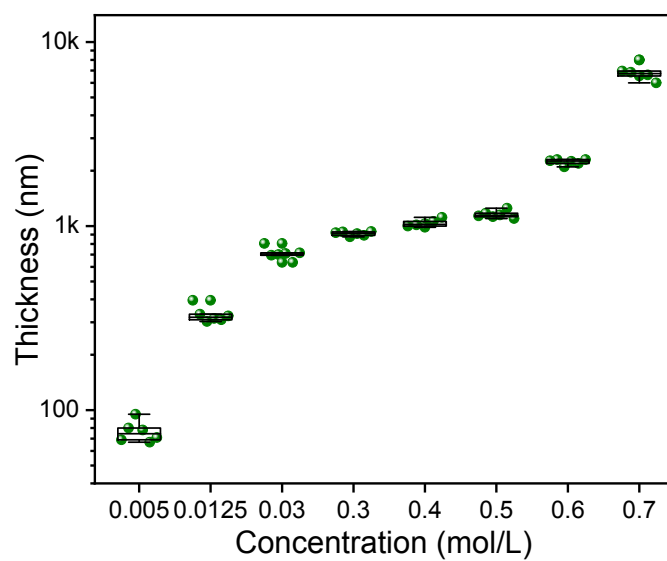

**Fig. S6** Statistics of film thickness under different concentrations.

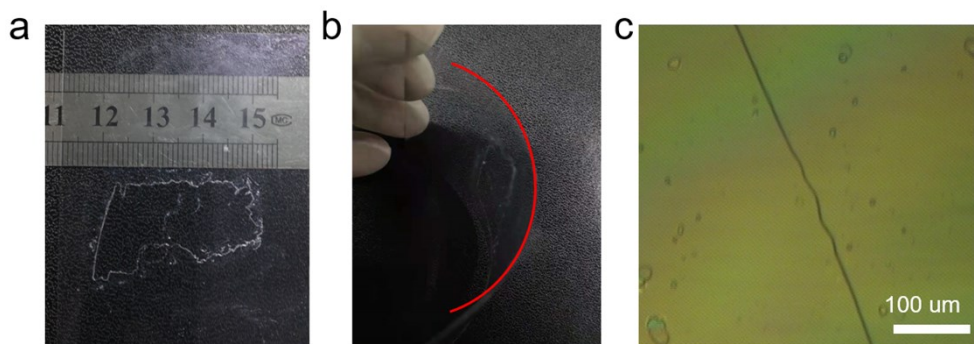

**Fig. S7** (a) A complete  $\text{BA}_2\text{PbBr}_4$  SCTF transferred to PET substrates. (b) The photograph showing the flexing angle for the  $\text{BA}_2\text{PbBr}_4$  SCTF. (c) Photograph of the  $\text{BA}_2\text{PbBr}_4$  SCTF after bending.

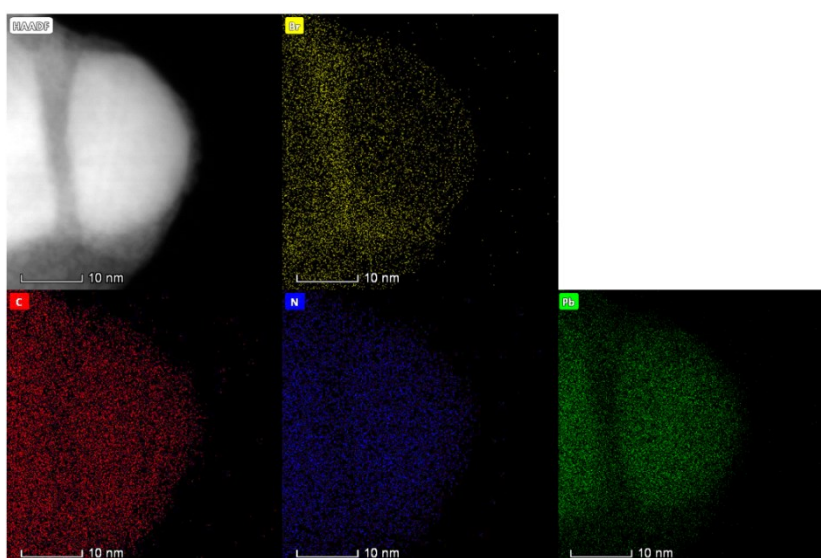

**Fig. S8** HAADF imaging and corresponding STEM-EDS elemental mapping of Br, C, N and Pb, respectively.

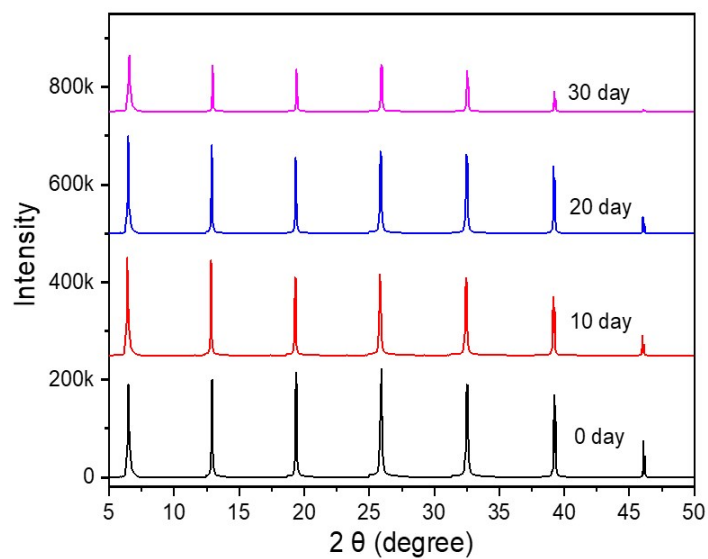

**Fig. S9** XRD patterns of  $\text{BA}_2\text{PbBr}_4$  perovskite stored for 30 days under ambient environment.

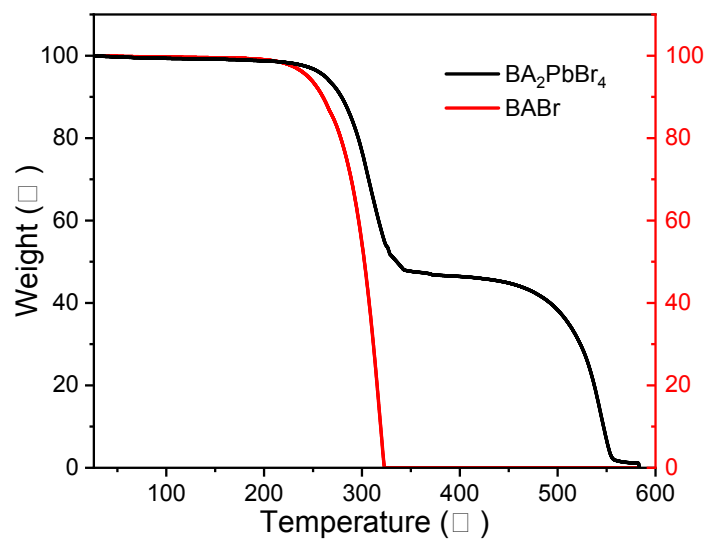

**Fig. S10** The thermal stability of the  $\text{BA}_2\text{PbBr}_4$  and  $\text{BAbR}$  crystal powder measured using thermogravimetric.

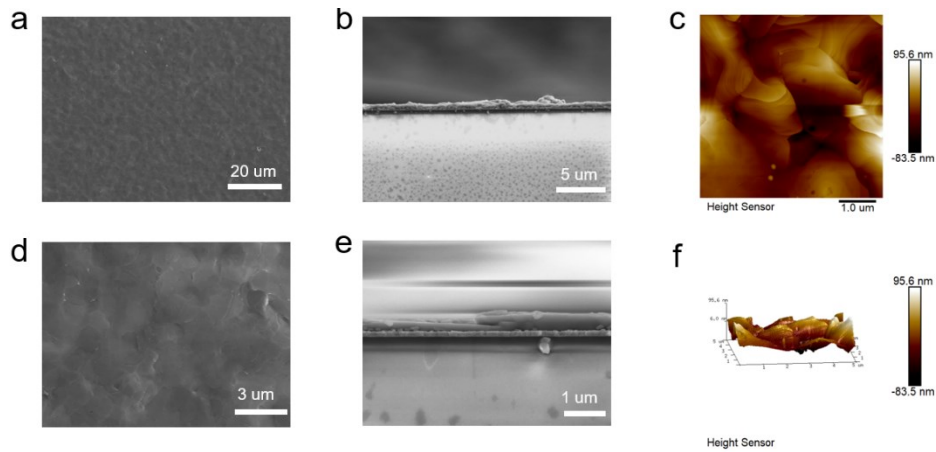

**Fig. S11** (a, d) SEM image of the  $\text{BA}_2\text{PbBr}_4$  polycrystalline film top view with different scale bar. (b, e) Cross-sectional SEM image of  $\text{BA}_2\text{PbBr}_4$  polycrystalline film with different scale bar. (c, f) AFM image of a  $\text{BA}_2\text{PbBr}_4$  polycrystalline film surface.

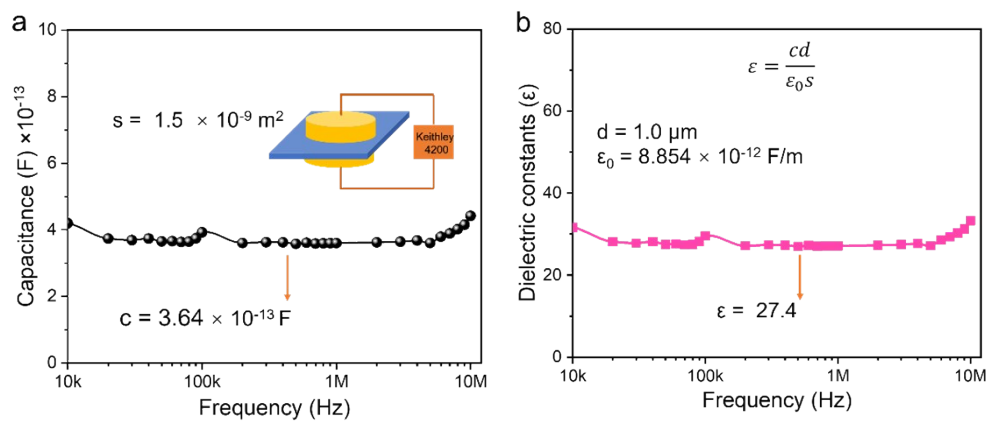

**Fig. S12** (a) The capacitance and (b) dielectric constant dependent frequency curves of the  $\text{BA}_2\text{PbBr}_4$  SCTF. Devices were fabricated by depositing  $\sim 100$  nm thick Au on two opposite surfaces of the  $\text{BA}_2\text{PbBr}_4$  SCTF. The thickness of the SCTF is  $1 \mu\text{m}$ . The area is  $1.5 \times 10^{-9} \text{m}^2$ .

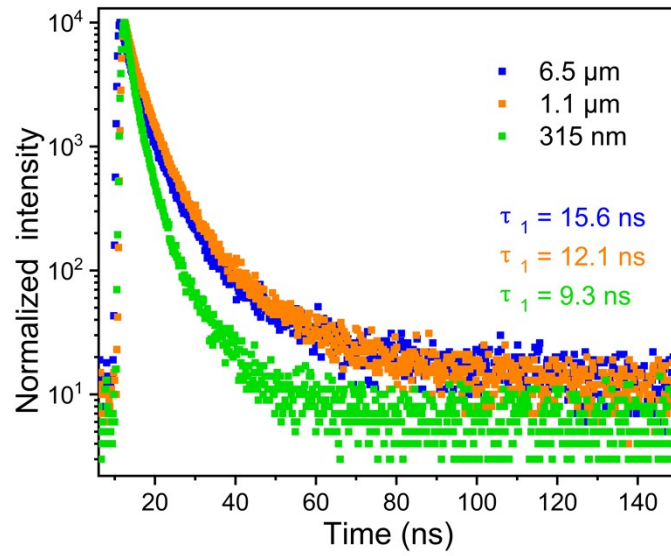

**Fig. S13** Time-dependent PL decay curve of  $\text{BA}_2\text{PbBr}_4$  SCTF with different thickness, the excitation laser beam wavelength is 375 nm.

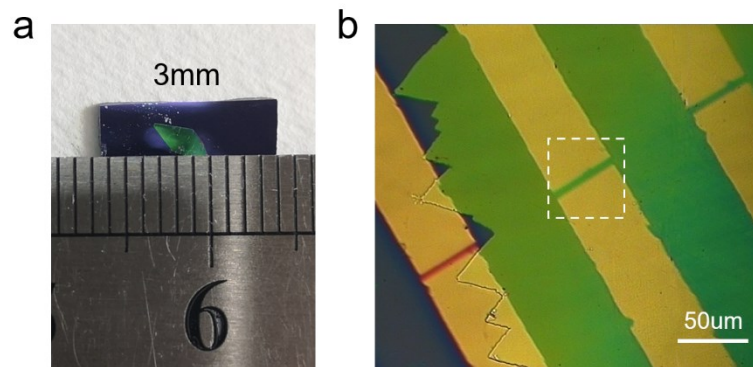

**Fig. S14** (a) A photograph of  $\text{BA}_2\text{PbBr}_4$  SCTF on  $\text{Si/SiO}_2$  substrate. (b) The test object illustration of the photosensor.
